# Supplementary material for: Giant emission enhancement from Cs 3 Bi 2 Br 9 via oxygen-induced optimization of radiation channels
Source: Royal Society of Chemistry journal article supplement (doi:10.1039/d5nr01915j), 2025-11-20
Supplement: d5nr01915j1.pdf [file d5nr01915j1.pdf]

## Giant Emission Enhancement from Cs<sub>3</sub>Bi<sub>2</sub>Br<sub>9</sub> via Oxygen-induced Optimization of Radiation Channels

Boning Han<sup>†a,e\*</sup>, Jianpeng Zhao<sup>†b</sup>, Shiyang Guo<sup>†c</sup>, Jinkai Qin<sup>†a</sup>, Zhenfu Song<sup>a</sup>, Xiaobo Han<sup>d\*</sup>, Chunliang Li<sup>a</sup>, Yalong Shen<sup>f</sup>, Xuwei Wang<sup>a</sup>, Jizhong Song<sup>b\*</sup>

<sup>a</sup> Tianjin Key Lab for Photoelectric Materials & Devices School of Materials Science and Engineering Tianjin University of Technology, Tianjin 300384, China

<sup>b</sup> Key Laboratory of Materials Physics of Ministry of Education, School of Physics and Microelectronics, Zhengzhou University, Daxue Road 75, Zhengzhou 450052, China

<sup>c</sup> College of Physics Science and Technology, Yangzhou University, Yangzhou, China

<sup>d</sup> Hubei Key Laboratory of Optical Information and Pattern Recognition, Wuhan Institute of Technology, Wuhan 430205, China

<sup>e</sup> School of Materials Science and Engineering, MIIT Key Laboratory of Advanced Display Materials and Devices, Institute of Optoelectronics & Nanomaterials, Nanjing University of Science and Technology, Nanjing 210094, China

<sup>f</sup> School of Biological and Materials Engineering, Suqian University, Suqian 223800, People's Republic of China

Email: [69023591@email.tjut.edu.cn](mailto:69023591@email.tjut.edu.cn), [hanxiaobo@wit.edu.cn](mailto:hanxiaobo@wit.edu.cn), [songjizhong@zzu.edu.cn](mailto:songjizhong@zzu.edu.cn)

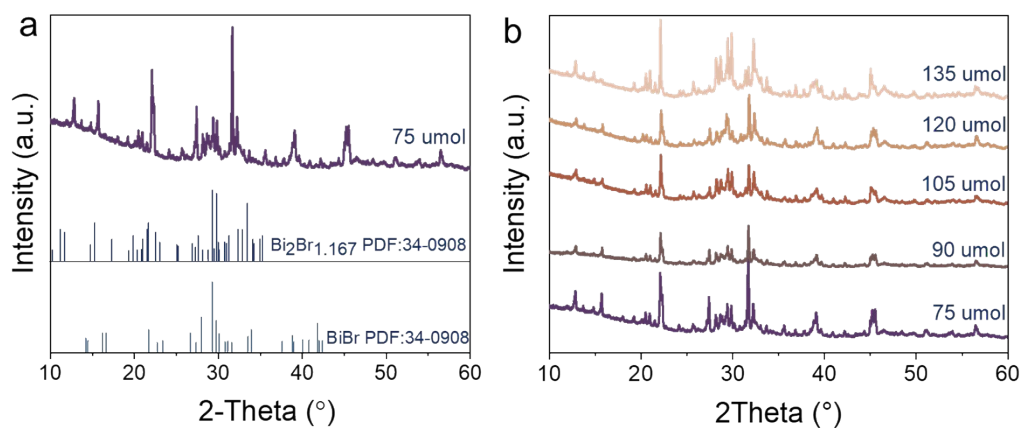

**Figure S1** (a) XRD patterns of  $\text{Cs}_3\text{Bi}_2\text{Br}_9$  with 75  $\mu\text{mol}$  OLAM, and the standard PDF card of  $\text{Bi}_2\text{Br}_{1.167}$  and BiBr. (b) XRD patterns of  $\text{Cs}_3\text{Bi}_2\text{Br}_9$  with different OLAM content of 75, 90, 105, 120, and 135  $\mu\text{mol}$ , respectively.

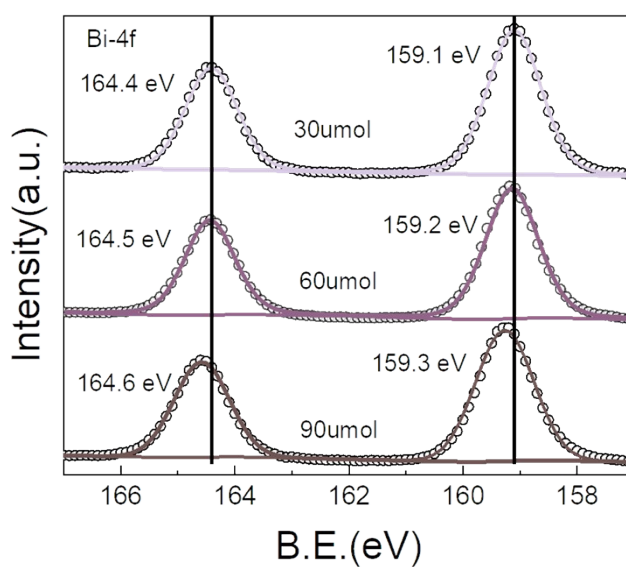

**Figure S2** XPS spectra of  $\text{Cs}_3\text{Bi}_2\text{Br}_9$  samples with different content of OLAM.

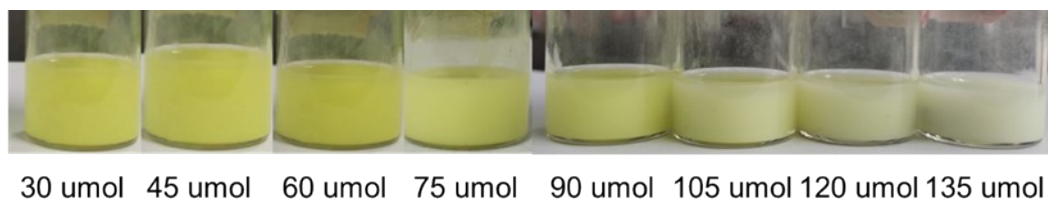

**Figure S3** The photographs of synthesized  $\text{Cs}_3\text{Bi}_2\text{Br}_9$  solution in ethanol, with different content of

OLAM.

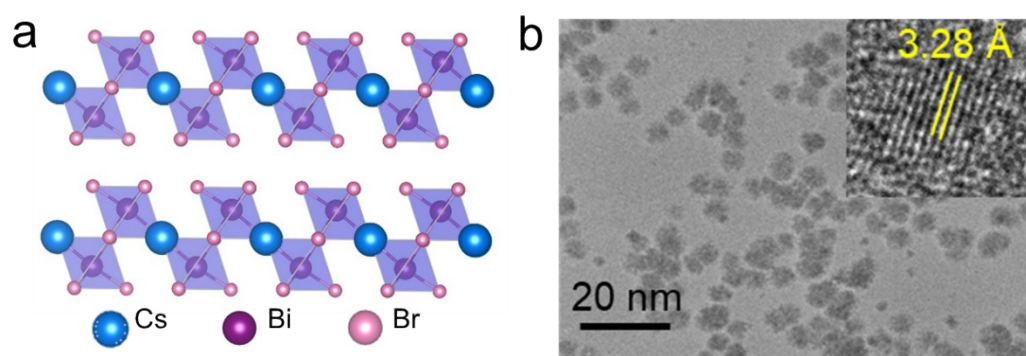

**Figure S4** (a) Crystal structure of  $\text{Cs}_3\text{Bi}_2\text{Br}_9$ . (b) The TEM and HRTEM images of  $\text{Cs}_3\text{Bi}_2\text{Br}_9$ .

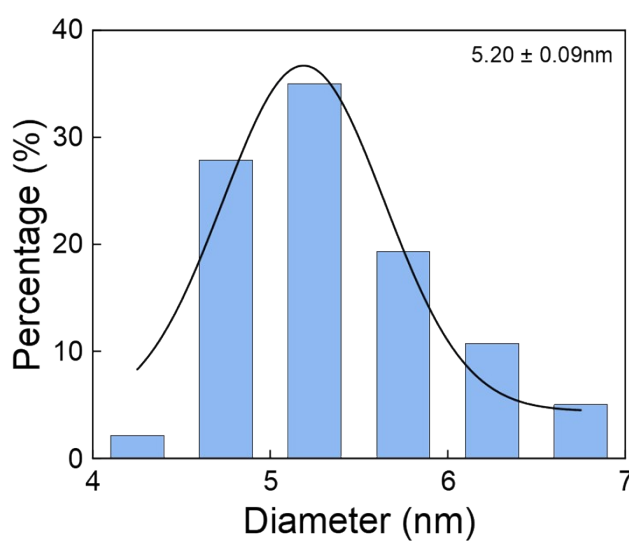

**Figure S5** Size distribution histogram of the  $\text{Cs}_3\text{Bi}_2\text{Br}_9$  crystals based on TEM images.

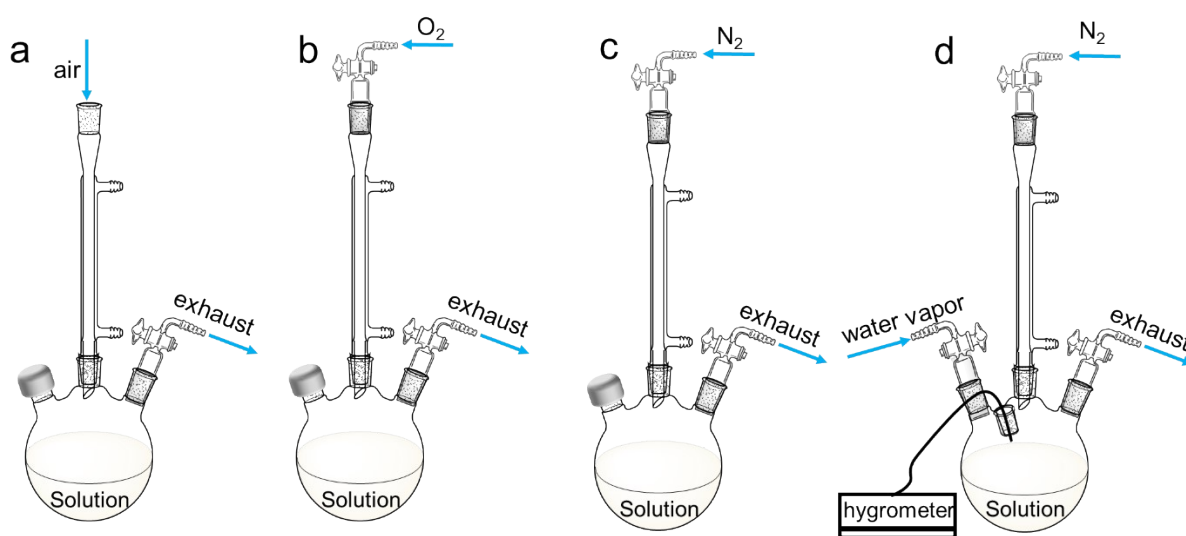

**Figure S6** Schematic diagrams of the different atmospheric environments of (a) ambient air, (b) dry oxygen ( $\text{O}_2$ ), (c) dry nitrogen ( $\text{N}_2$ ), and (d) moist nitrogen with 40% relative humidity.

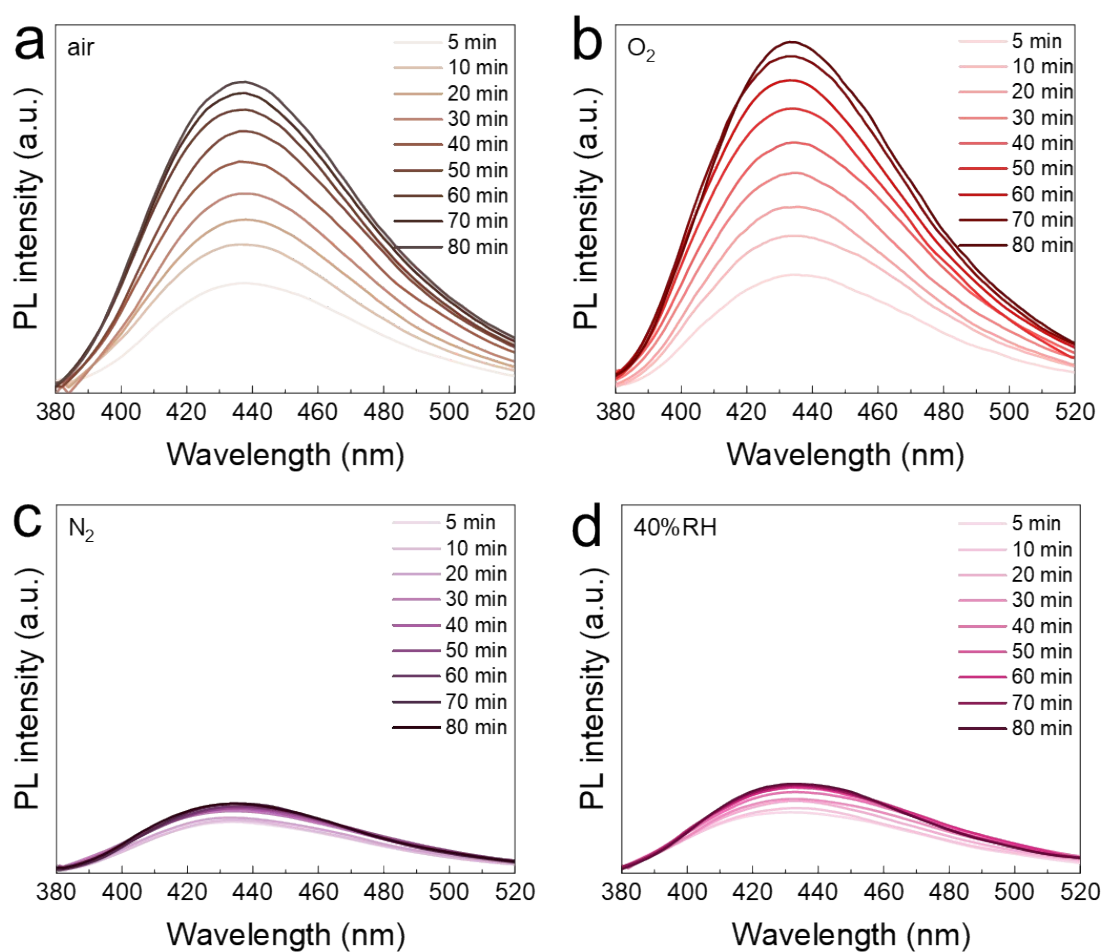

**Figure S7** The PL spectra of  $\text{Cs}_3\text{Bi}_2\text{Br}_9$  during longtime exposure in different conditions.

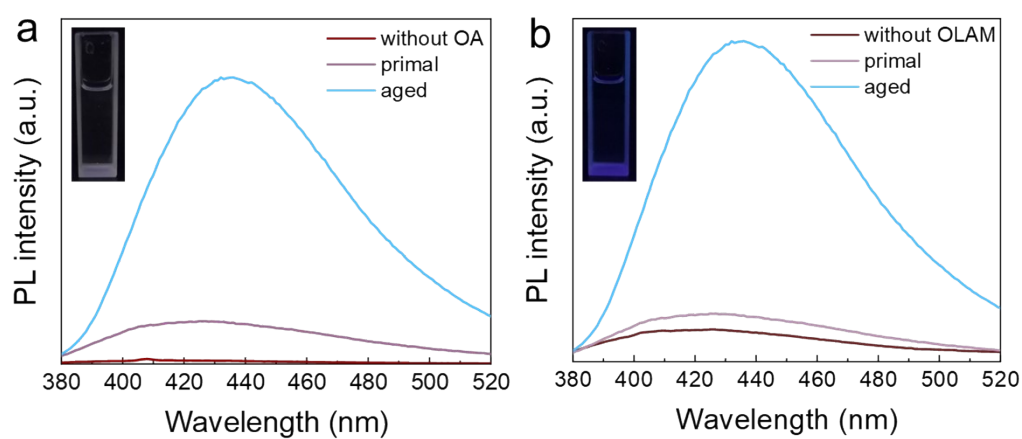

**Figure S8** The PL spectra of  $\text{Cs}_3\text{Bi}_2\text{Br}_9$  prepared without (a) OA and (b) OLAM, as compared with the primal and aged samples.

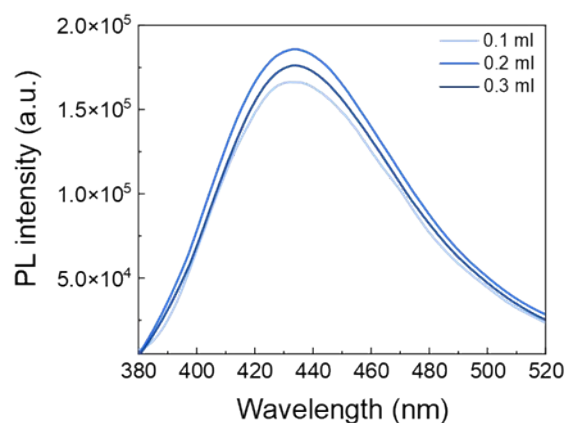

**Figure S9** The PL spectra of  $\text{Cs}_3\text{Bi}_2\text{Br}_9$  with different OA content.

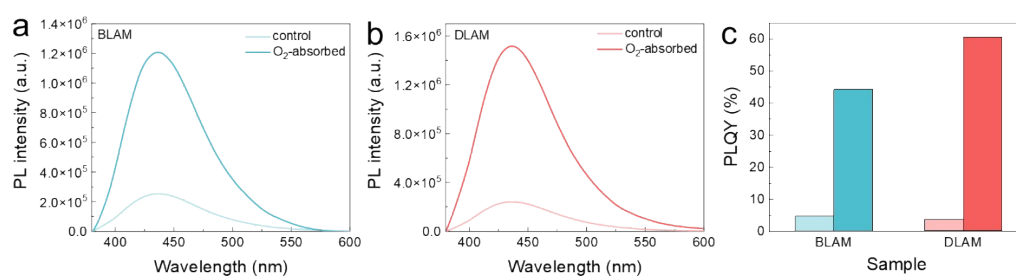

**Figure S10** PL spectra of  $\text{Cs}_3\text{Bi}_2\text{Br}_9$  with (a) BLAM and (b) DLAM for control and  $\text{O}_2$ -absorbed samples, with (c) corresponding PLQY.

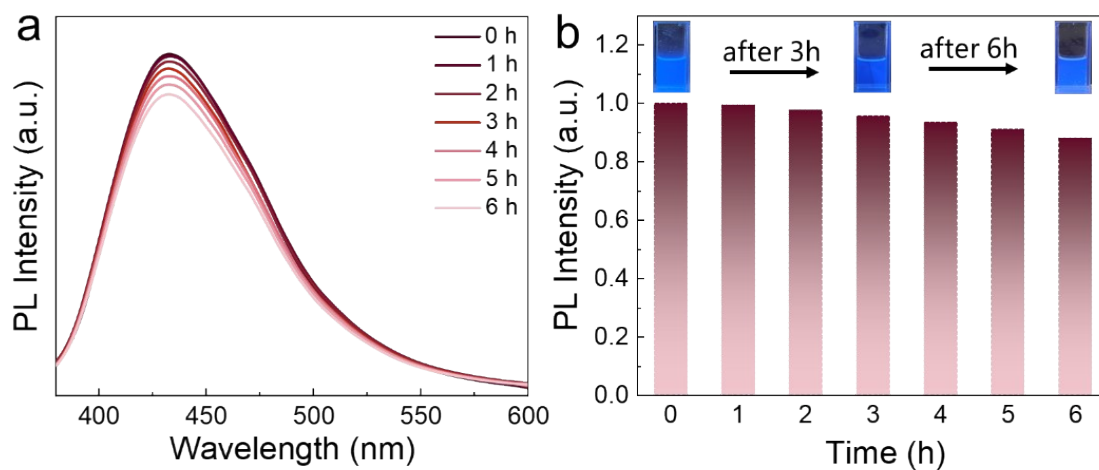

**Figure S11** (a) PL spectra of  $\text{Cs}_3\text{Bi}_2\text{Br}_9$  solution during prolonged mixing with deionized water and (b) the corresponding statistical analysis of normalized peak intensities.

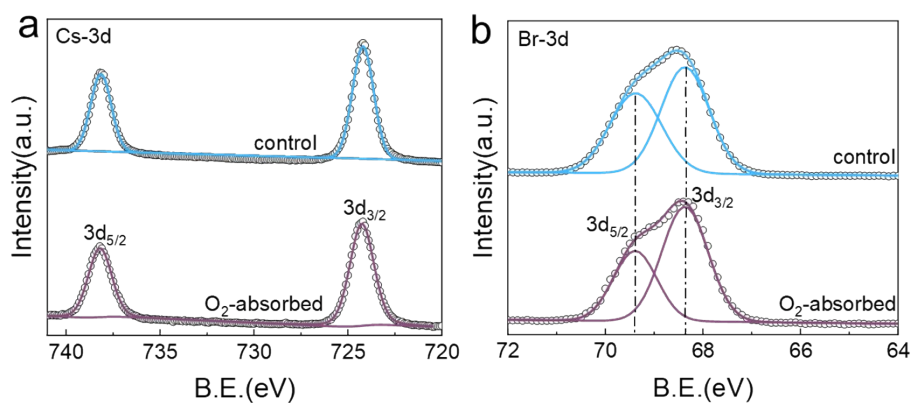

**Figure S12** XPS spectra of (a) Cs-3d and (b) Br-3d for control and O<sub>2</sub>-absorbed Cs<sub>3</sub>Bi<sub>2</sub>Br<sub>9</sub> NCs.

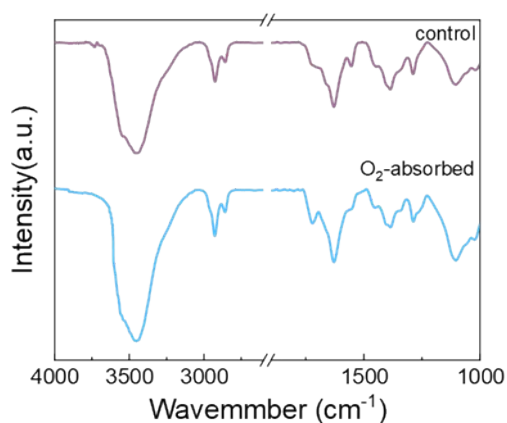

**Figure S13** FTIR spectra of control and O<sub>2</sub>-absorbed Cs<sub>3</sub>Bi<sub>2</sub>Br<sub>9</sub> samples.

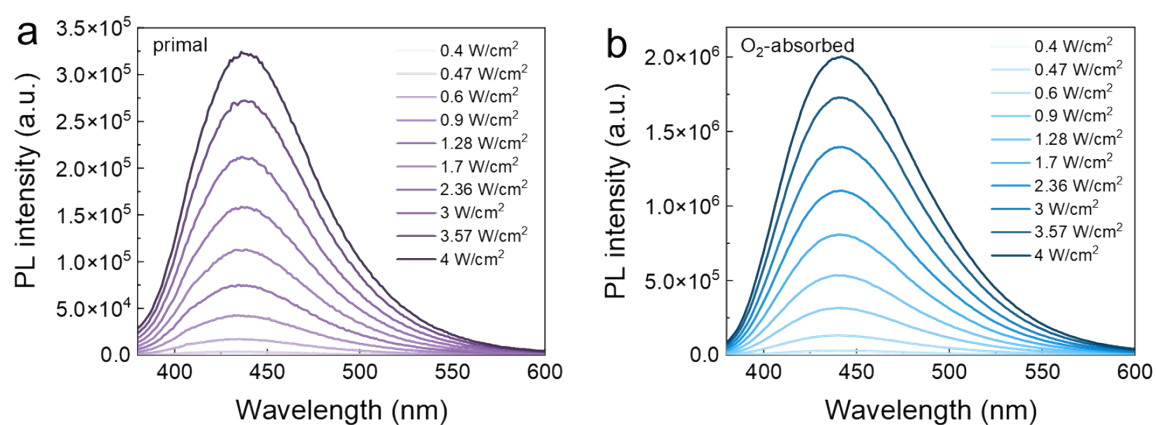

**Figure S14** PL spectra of (a) control and (b) O<sub>2</sub>-absorbed Cs<sub>3</sub>Bi<sub>2</sub>Br<sub>9</sub> under different excitation power intensities.

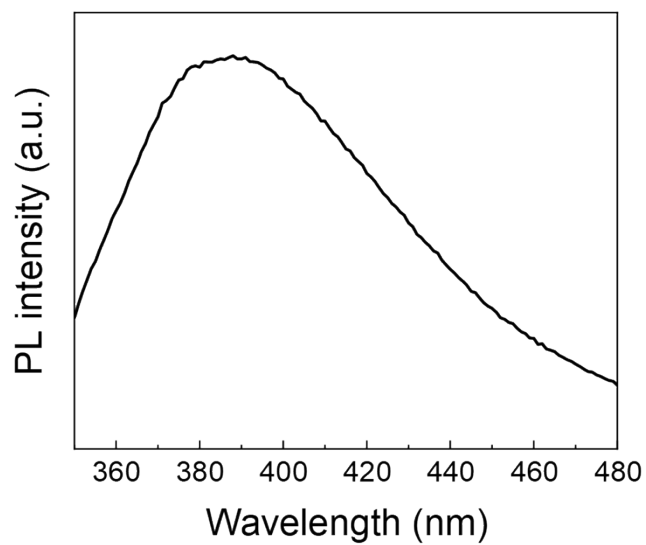

**Figure S15** PL spectra of mixed solution with oleic acid (OA), n-octylamine (OLAM) and dimethyl sulfoxide (DMSO) used for  $\text{Cs}_3\text{Bi}_2\text{Br}_9$  preparation.

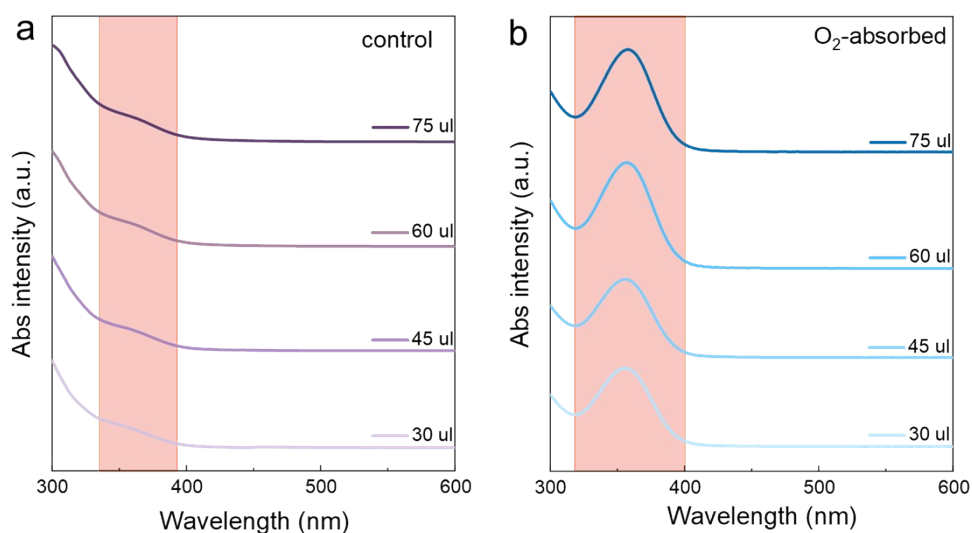

**Figure S16** UV-vis absorption spectra of (a) control and (b)  $\text{O}_2$ -absorbed  $\text{Cs}_3\text{Bi}_2\text{Br}_9$  with different OLAM content.

**Table S1** PL lifetime for primal and aged  $\text{Cs}_3\text{Bi}_2\text{Br}_9$  NCs in ethanol solution

| Sample                                                     | $A_1$ | $\tau_1$ | $A_2$ | $\tau_1$ | $\tau$ |
|------------------------------------------------------------|-------|----------|-------|----------|--------|
| Control $\text{Cs}_3\text{Bi}_2\text{Br}_9$                | 0.97  | 1.61     | 0.10  | 1.63     | 1.61   |
| $\text{O}_2$ -absorbed $\text{Cs}_3\text{Bi}_2\text{Br}_9$ | 0.77  | 5.67     | 0.23  | 12.27    | 7.19   |

**Table S2** PL lifetime for primal and aged Cs<sub>3</sub>Bi<sub>2</sub>Br<sub>9</sub> NCs under different temperature

| Sample       | A <sub>1</sub> | $\tau_1$ | A <sub>2</sub> | $\tau_1$ | $\tau$ |
|--------------|----------------|----------|----------------|----------|--------|
| Primal-100 K | 0.73           | 2.07     | 0.27           | 11.86    | 4.71   |
| Primal-180 K | 0.92           | 1.87     | 0.09           | 12.48    | 2.84   |
| Primal-260 K | 0.93           | 1.71     | 0.08           | 10.23    | 2.39   |
| Primal-300 K | 0.97           | 1.61     | 0.10           | 1.63     | 1.61   |
| Aged-100 K   | 0.69           | 6.59     | 0.31           | 11.85    | 8.22   |
| Aged-180 K   | 0.71           | 6.52     | 0.30           | 11.57    | 8.10   |
| Aged-260 K   | 0.74           | 5.45     | 0.27           | 12.39    | 7.48   |
| Aged-300 K   | 0.77           | 5.67     | 0.23           | 12.27    | 7.19   |
